# Supplementary material for: Large-scale efficient water harvesting using bioinspired micro-patterned copper oxide nanoneedle surfaces and guided droplet transport
Source: Royal Society of Chemistry journal article supplement (doi:10.1039/c9na00405j), 2019-01-01
Supplement: c9na00405j1.pdf [file c9na00405j1.pdf]

## Large-Scale Efficient Water Harvesting using Bioinspired Micro-Patterned Copper Oxide Nanoneedle Surfaces and Guided Droplet Transport

Vipul Sharma, Kyriacos Yiannacou, Markus Karjalainen, Kimmo lahtonen, Mika Valden and  
Veikko Sariola\*

<sup>1</sup>Faculty of Medicine and Health Technology, Tampere University, Finland

Korkeakoulunkatu 3, 33720 Tampere, Finland

<sup>2</sup>Faculty of Engineering and Natural Sciences, Tampere University

P.O. Box 692, FI-33014 Tampere University, Finland

\*Email: [veikko.sariola@tuni.fi](mailto:veikko.sariola@tuni.fi)

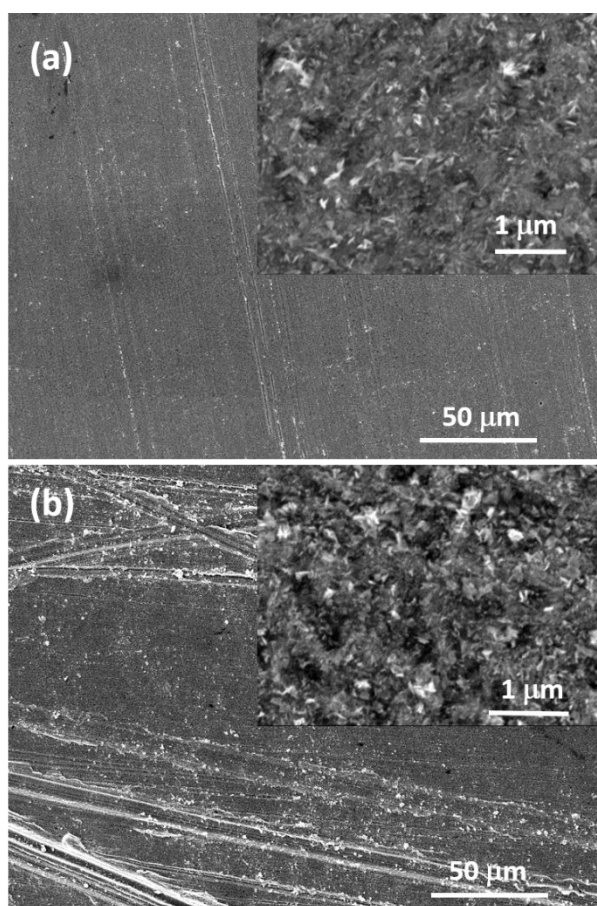

**Figure S1.** FESEM image of the CuO surfaces fabricated in (a) absence of scoring with sandpaper and (b) absence of H<sub>2</sub>SO<sub>4</sub> treatment.

***Determination of oxidation states:***

The determination of Cu oxidation state is based on the combined analysis of the XPS Cu 2p, O 1s, and XAES Cu  $L_3M_{45}M_{45}$  transitions. The O 1s components of  $Cu^+$  and  $Cu^{2+}$  oxides are located at 530.4 and 529.4 eV, respectively. The  $Cu^+$  state induces a chemical shift of -2.1 eV in the Cu LMM peak ( $E_K$ : 919.0  $\rightarrow$  916.9 eV), and a weak shakeup satellite in the Cu 2p region at +14.0 eV higher binding energy than the main peak. The  $Cu^{2+}$  state induces a chemical shift of -1.0 eV in the Cu LMM peak ( $E_K$ : 919.0  $\rightarrow$  918.0 eV), and a strong shakeup satellite in the Cu 2p region between +7.1 and +9.9 eV higher binding energy than the main peak which is broadened and shifted +1.2 eV compared to the  $Cu^0$  state ( $E_B$ : 932.4  $\rightarrow$  933.6 eV). The modified Auger parameters,  $E_B(Cu\ 2p_{3/2})+E_K(Cu\ LMM)$ , of  $Cu^0$ ,  $Cu^+$ , and  $Cu^{2+}$  are 1851.4 eV, 1849.3 eV, and 1851.6 eV, respectively.

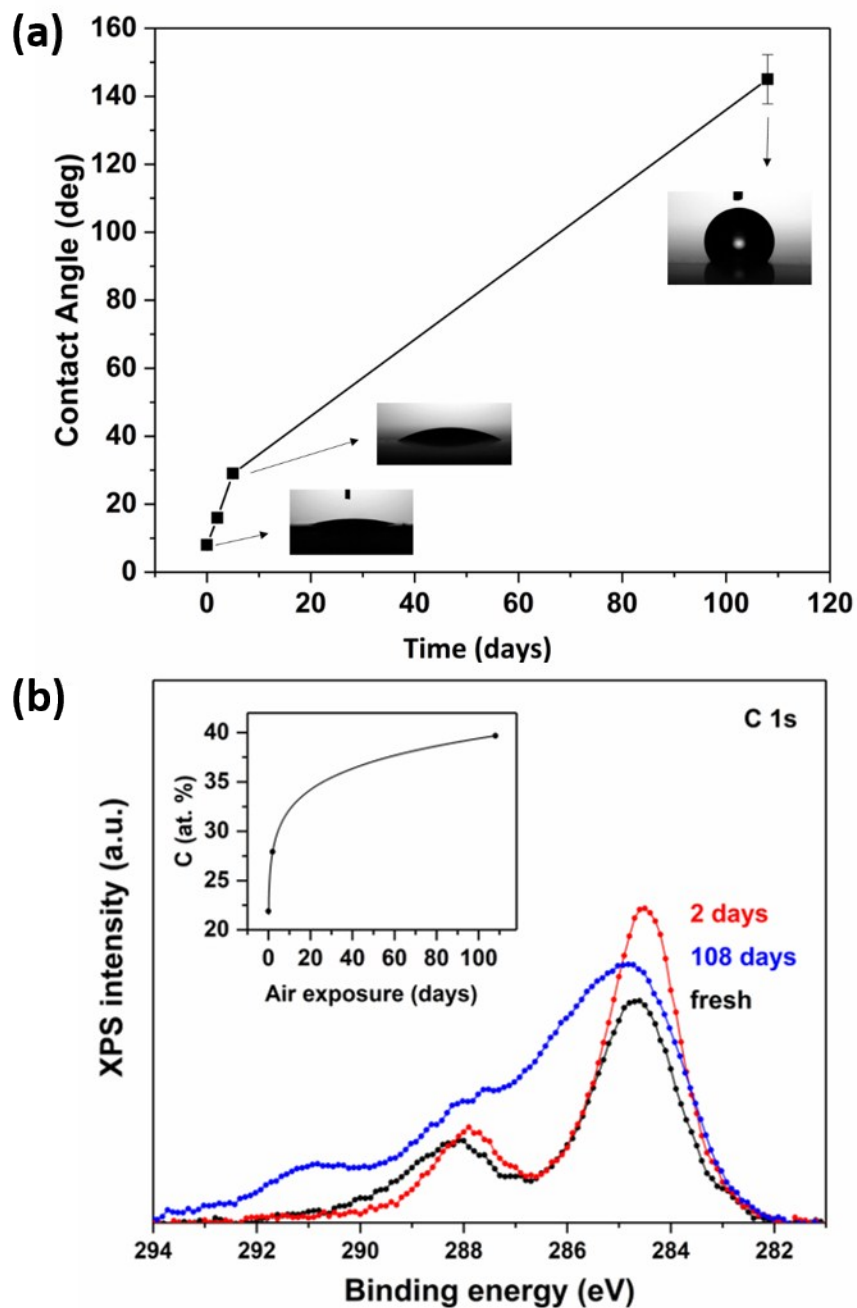

**Figure S2.** (a) Time-resolved wettability (contact angle) on uncoated CuO nanoneedle surfaces and (b) XPS spectra showing high-resolution spectra for C 1s at different exposure times: 0, 2 and 108 days. Inset shows the overall atomic percentage of adsorbed carbon (fitting line is just to guide the eye). The C 1s spectrum in case of 108 days sample broadens to higher binding energies, partly because of different volatile organic species adsorbed over the time in lab conditions.

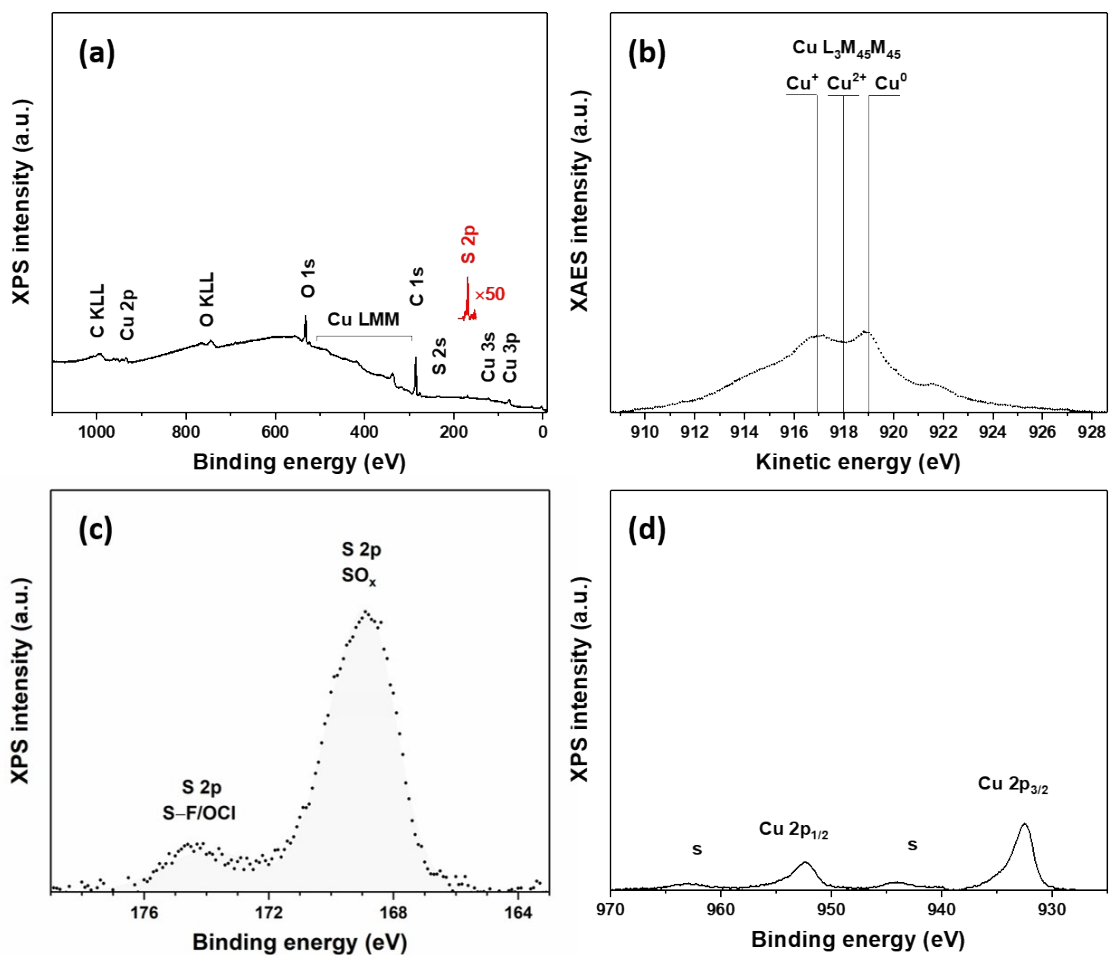

**Figure S3.** XPS Spectra of scored Cu Surfaces showing the bisulfate adsorption on to the surface. The data was taken just after the treatment of the surface with H<sub>2</sub>SO<sub>4</sub> (a) XPS survey spectrum (black) and S 2p core level spectrum (red), (b) XAES Cu L<sub>3</sub>M<sub>45</sub>M<sub>45</sub> spectrum, Cu<sup>0</sup>: 26.5 %, Cu<sup>+</sup>: 62.1%, /Cu-Cl/F/S: 11.4 %, (c) XPS S 2p spectrum and (d) XPS Cu 2p core level spectrum (932.5 eV).

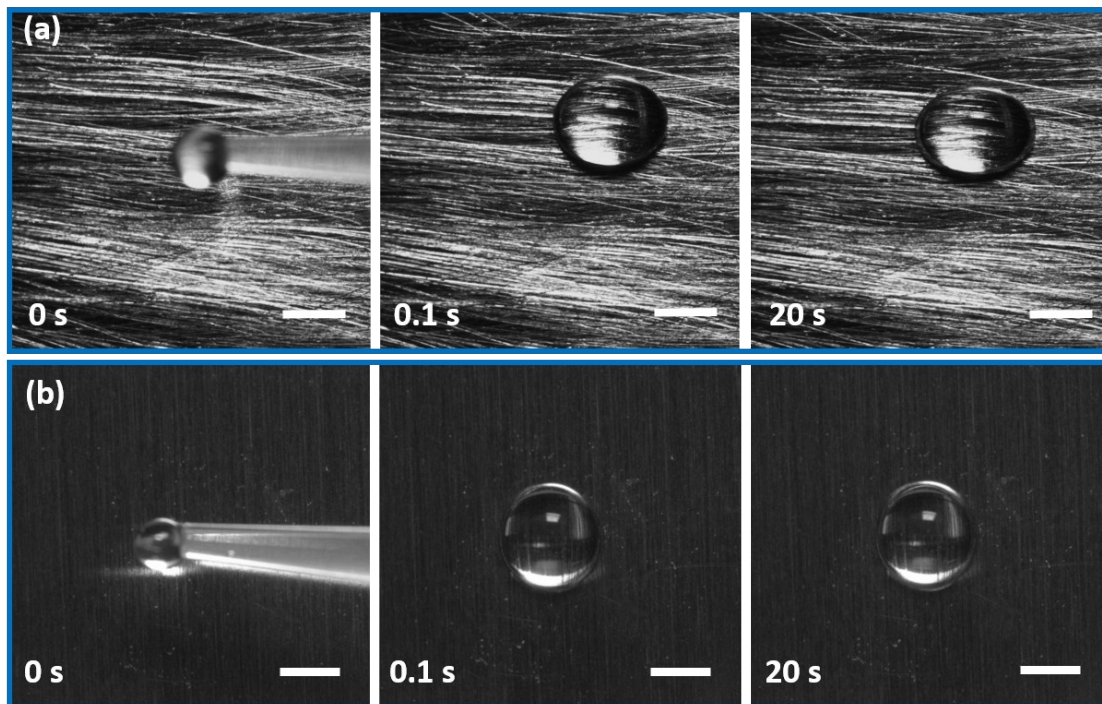

**Figure S4.** Images of a water droplet (1  $\mu\text{L}$ ) spreading on non-coated surfaces: (a) Scored Cu and (b) bare Cu at time 0, 0.1 and 20 s. Scale bar is 1 mm

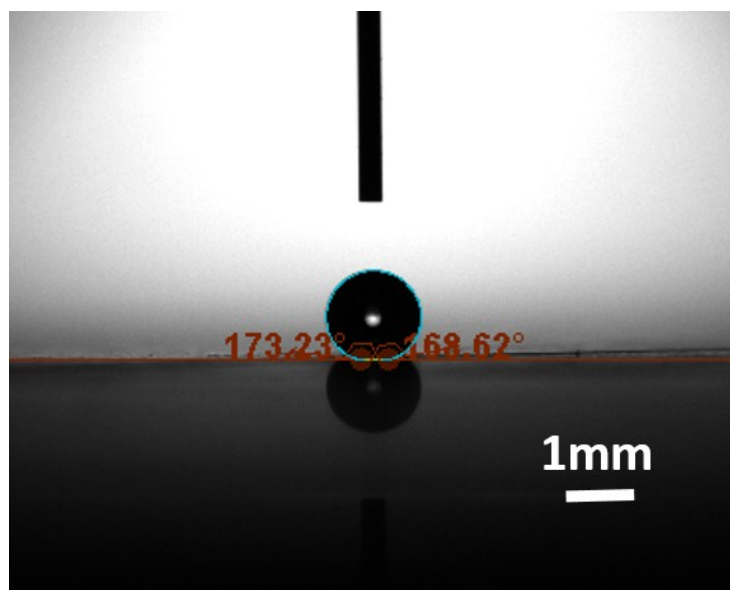

**Figure S5.** Contact angle of 1  $\mu\text{L}$  water droplet on super hydrophobic CuO microneedles.

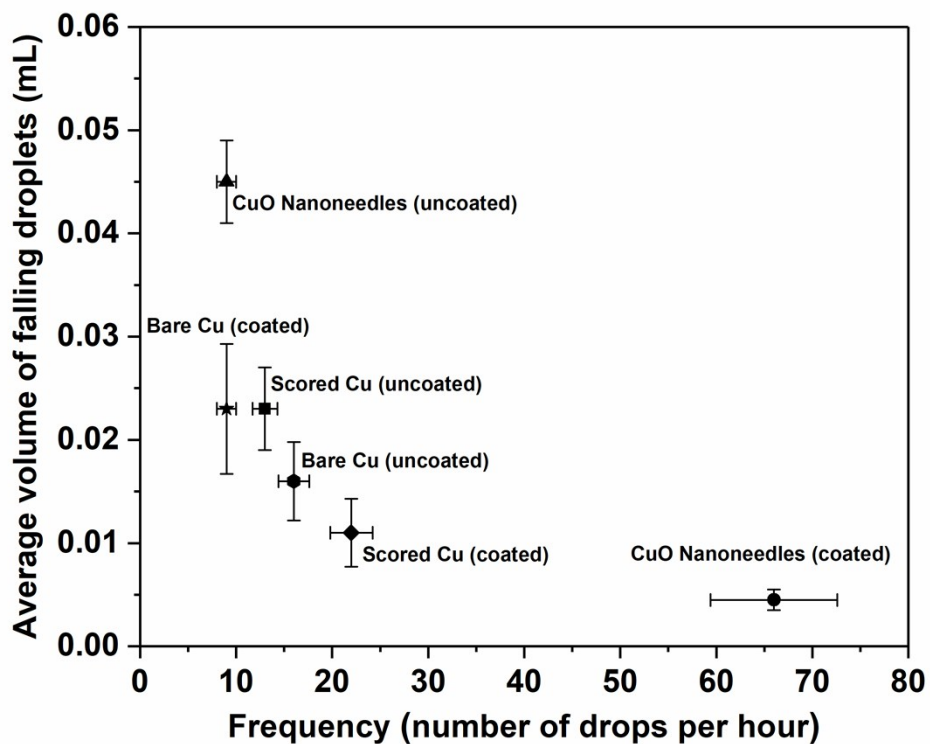

Figure S6. Average volume and frequency of the falling droplets (per hour) from the surfaces.

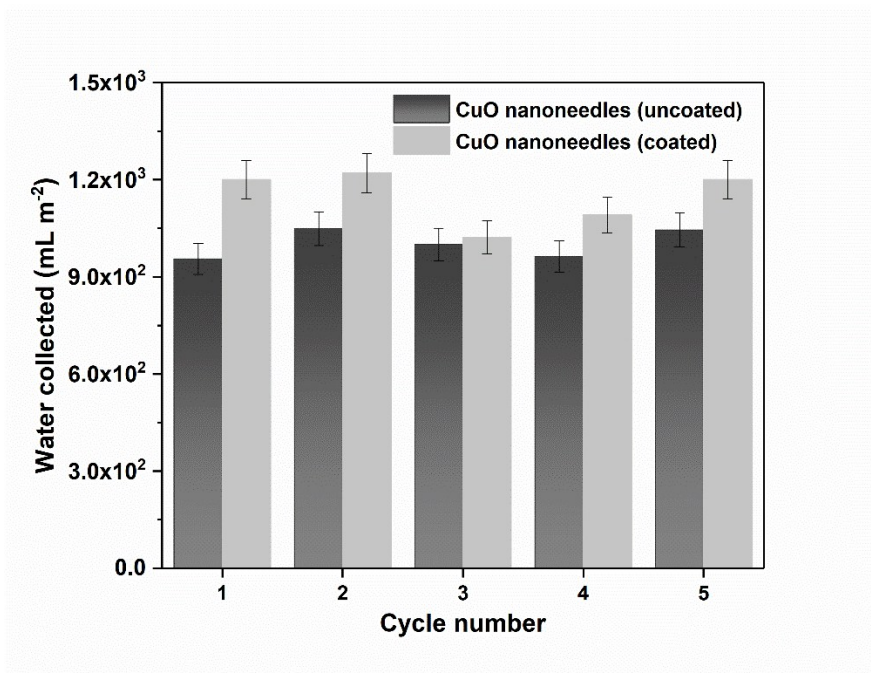

Figure S7. Reusability of the surfaces for water harvesting studies over the same patterned surfaces as water collected (mL m<sup>-2</sup>) for 2h.
